# Supplementary material
Source: publisher site journal article supplement (https://www.dovepress.com/article/428864)
Supplement: Supplementary file 1 [file get_supplementary_file.php]

Supplemental Figure 1. The PCA of samples in serum(a) and liver(b).


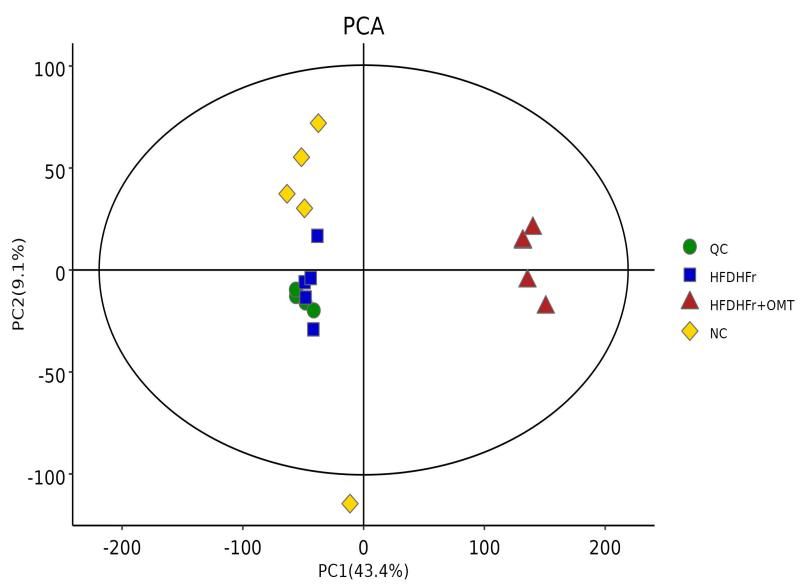

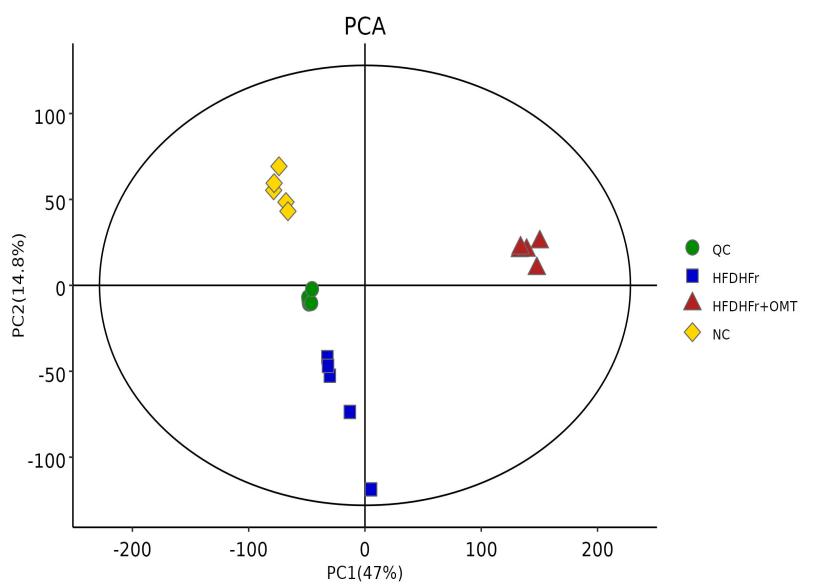


**a**

**b**


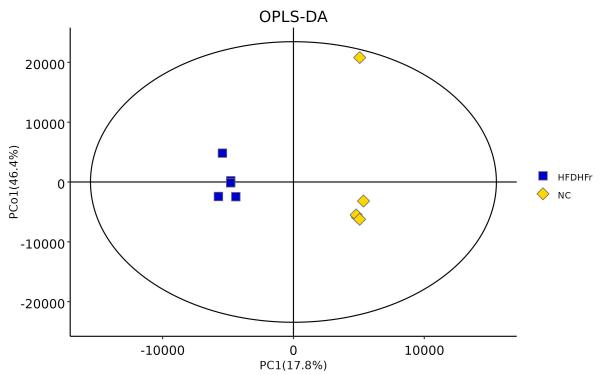

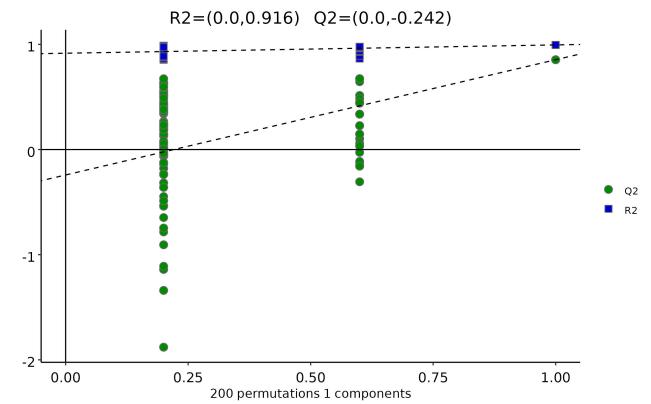

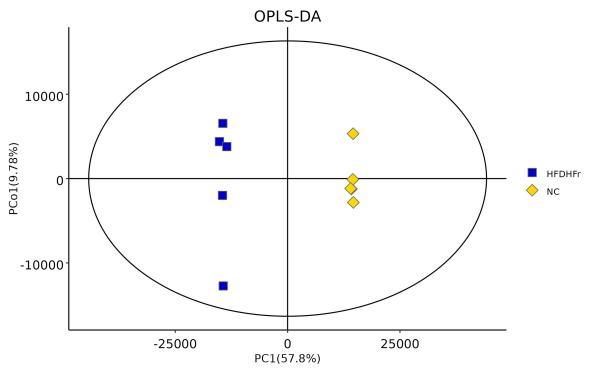

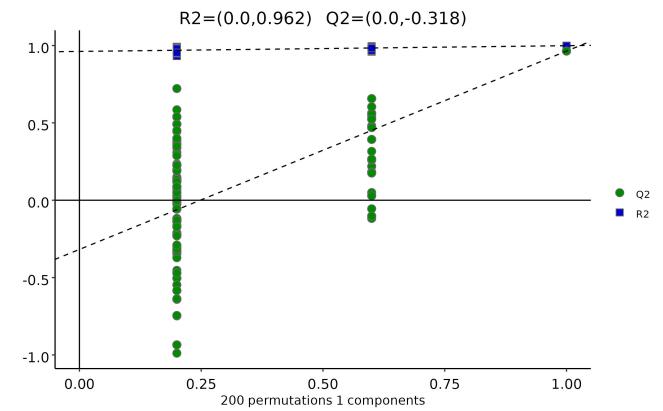


a

b

c

d

Supplemental Figure 2. The OPLS-DA(a) and Permutation(b) of samples in serum, the OPLS-DA(c) and Permutation(d) of samples in liver between HFDHFr group and NC group.

Supplemental Figure 3. The OPLS-DA(a) and Permutation(b) of samples in serum, the OPLS-DA(c) and Permutation(d) of samples in liver between HFDHFr+OMT group and HFDHFr group.

a

b

c

d


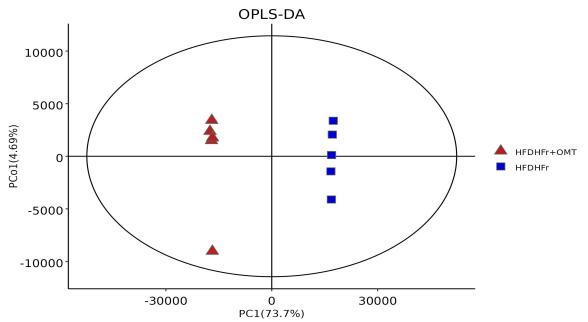

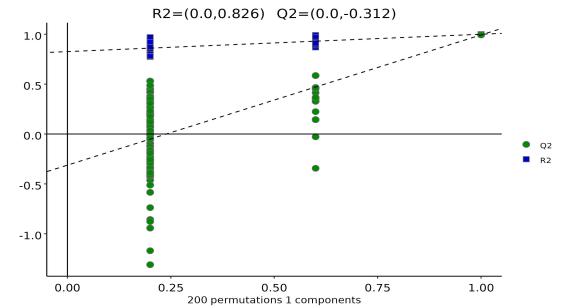

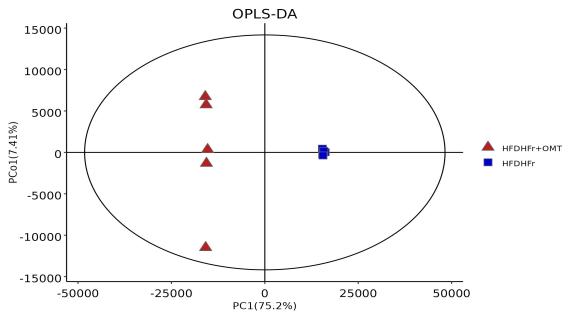

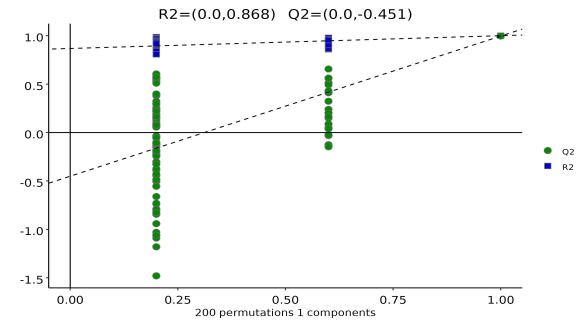


Supplemental Table 1. The number of different metabolites in each comparison group in serum and liver.

| Group | Number of different metabolites in serum | Number of different metabolites in liver |
| --- | --- | --- |
| HFDHFr vs NC | 163 | 352 |
| HFDHFr+OMT vs HFDHFr | 424 | 534 |
| HFDHFr+OMT vs HFDHFr vs NC | 414 | 565 |
